# Supplementary material for: Rare genetic variants in genes and loci linked to dominant monogenic developmental disorders cause milder related phenotypes in the general population
Source: PubMed Central journal article supplement (PMC9300873; doi:10.1016/j.ajhg.2022.05.011), 2022-06-13
Supplement: mmc1.pdf [file mmc1.pdf]

**The American Journal of Human Genetics, Volume 109**

**Supplemental information**

**Rare genetic variants in genes and loci linked  
to dominant monogenic developmental disorders cause  
milder related phenotypes in the general population**

**Rebecca Kingdom, Marcus Tuke, Andrew Wood, Robin N. Beaumont, Timothy M. Frayling, Michael N. Weedon, and Caroline F. Wright**

## Supplementary Information

### Supplementary Figures

**Supplementary Figure 1:** Histogram showing the Variant Allele Fraction (VAF) of variants located in *DNMT3A*, dashed line indicating the average VAF of variants in other genes, with filled line showing the average VAF of variants in *DNMT3A*.

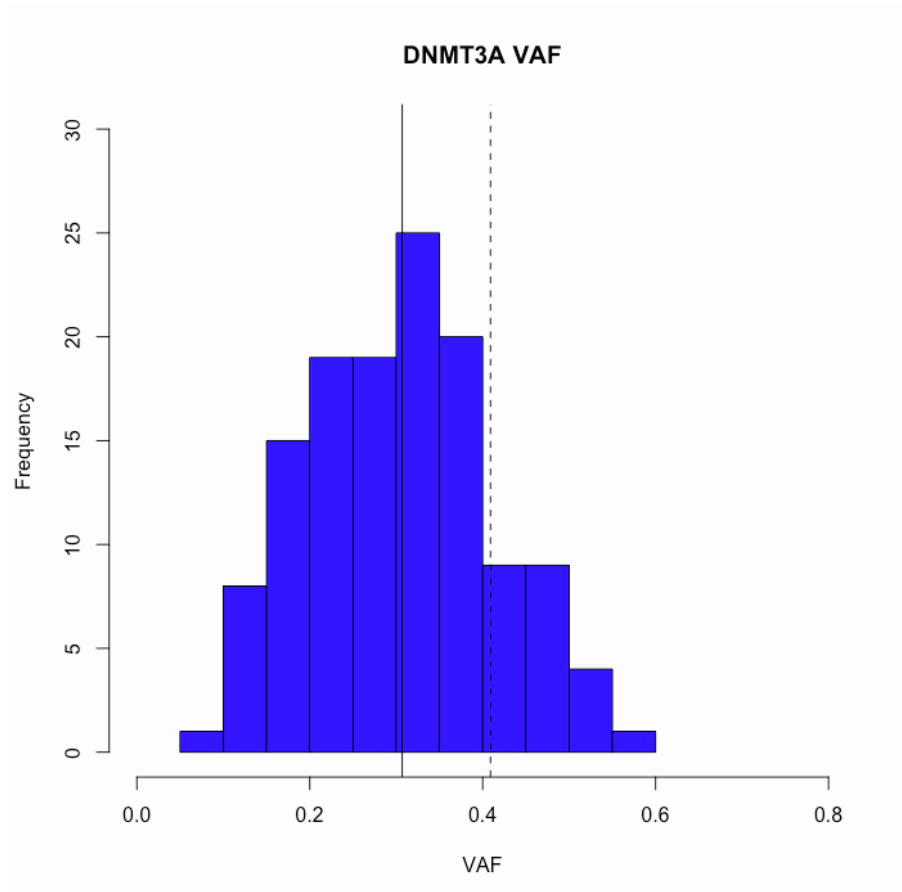

### Supplementary Tables

Included in an Excel file.

**Worksheet 1:** Known monoallelic DDG2P genes

**Worksheet 2:** Copy number variants in UKB overlapping 69 known DD loci

**Worksheet 3:** Gene panel association tests for LoF variants across different gene subsets

**Worksheet 4:** Gene panel association tests for deleterious missense variants across different CADD bins

**Worksheet 5:** Gene panel association tests excluding individuals diagnosed with a childhood developmental disorder

## Supplementary Methods

### STATA code: Logistic regression

```
<import UKB BOLT phenotype file>
<import UKB exome file>
<import pcs file>
<import list of traits to test - varlist>

#varlist includes following traits: employed degree infertile epilepsy_ukbdef ChildDD_any
AdultDD_any unable_to_work

#for LoF variants:
generate variant = 1 if v2 == "lof_variant"
generate dont_use = 1 if v2 == "missense_variant"
replace variant = 0 if variant != 1
replace dont_use = 0 if dont_use != 1

file open myfile using <file_to_save_to>,
write append
set more off

foreach var of varlist {
    logistic `var' variant centre sex age_base pcs* if valid_exome =1 & dont_use != 1

file write myfile "`var'" _tab (r(table)[1,1]) _tab (r(table)[2,1]) _tab (r(table)[4,1]) _tab
(r(table)[5,1]) _tab (r(table)[6,1]) _n
}

file close myfile
```

### STATA code: Linear regression

```
<import UKB BOLT phenotype file>
<import UKB exome file>
<import pcs file>
<import list of traits to test - varlist>

#varlist includes following traits: fluid_intelligence edu_yrs income reaction_time_raw_sin
pairs_test tdi age_education height mental_health numeric_memory_raw_sin
bmi_2016_raw_sin kids_fathered all_preg n_stillbirth

#for LoF variants:
generate variant = 1 if v2 == "lof_variant"
generate dont_use = 1 if v2 == "missense_variant"
replace variant = 0 if variant != 1
replace dont_use = 0 if dont_use != 1
```

```
file open myfile using <file_to_save_to>,  
write append  
set more off
```

```
foreach var of varlist {  
    regress `var' variant centre age_base sex pcs* if valid_exome = 1 & dont_use != 1
```

```
file write myfile "`var" _tab (r(table)[1,1]) _tab (r(table)[2,1]) _tab (r(table)[4,1]) _tab  
(r(table)[5,1]) _tab (r(table)[6,1]) _n  
}
```

```
file close myfile
```
